# Supplementary material for: In Vivo and in vitro antitumor activity of tomatine in hepatocellular carcinoma
Source: Frontiers journal article supplement (doi:10.3389/fphar.2022.1003264), 2022-09-09
Supplement: Image_1.pdf [file Image_1.pdf]

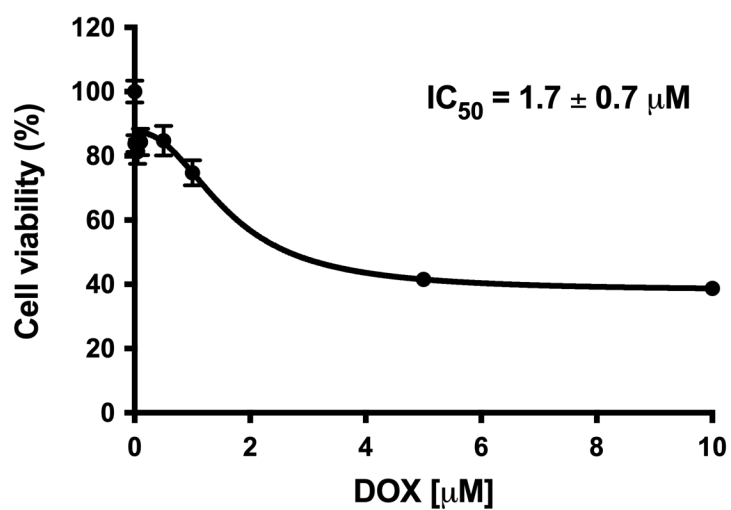

**Figure S1.** Concentration-response curve of positive control Doxorubicin (DOX) in HepG2 cells after 24 h incubation as determined with resazurin. Data shown are mean  $\pm$  SEM of 3 independent experiments.
